# Supplementary material for: Drug-induced permeabilization of parasite's digestive vacuole is a key trigger of programmed cell death in Plasmodium falciparum
Source: PubMed Central journal article supplement — Cell Death Dis. 2011 Oct 13;2(10):e216–. doi: 10.1038/cddis.2011.97 (PMC3219093; doi:10.1038/cddis.2011.97), 2011-10-13
Supplement: cddis201197x2.pdf [file cddis201197x2.pdf]

Supplementary Data  
Figure S2

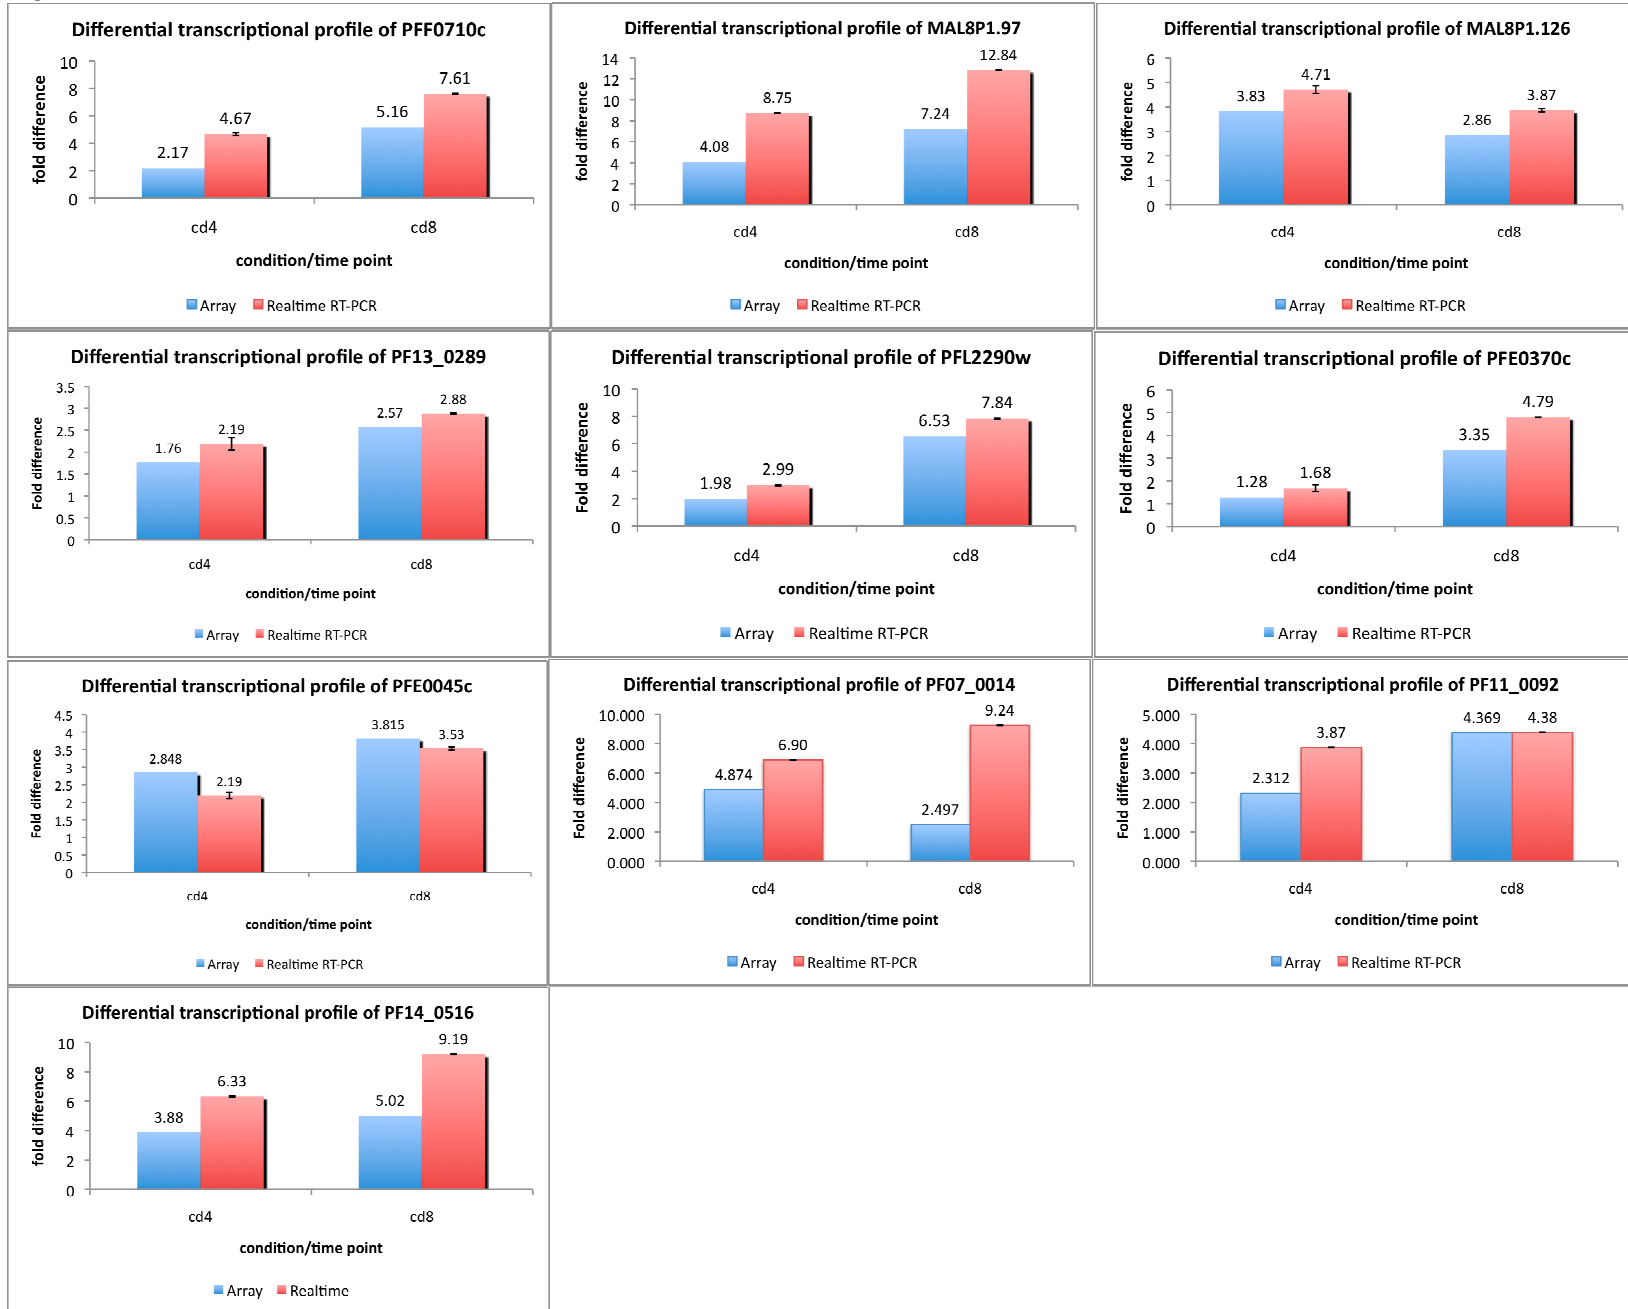

Supplementary Data  
Figure S3

A.

Wild-type genome, with gene-specific probe:

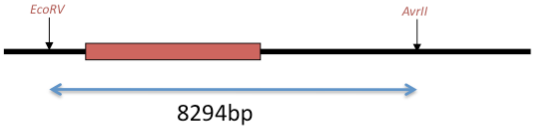

Integrated into genome, with gene-specific probe:

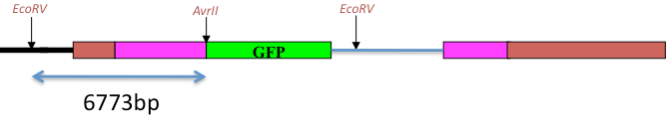

B.

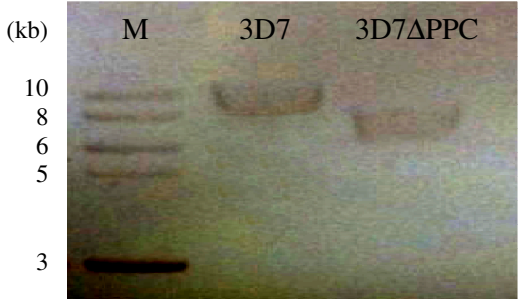

Supplementary Data  
Table S5

| <b>Gene</b> | <b>Forward primer</b> | <b>Forward primer sequence (5' - 3')</b> | <b>Reverse primer</b> | <b>Reverse primer sequence (5' - 3')</b> |
|-------------|-----------------------|------------------------------------------|-----------------------|------------------------------------------|
| PFF0710c    | PFF0710cF             | TTGCACTCCTCTTTCTACGCC                    | PFF0710cR             | AATCAACATTAAGGAAACGGAAATC                |
| MAL8P1.97   | MAL8P1.97F            | TGGATTATGCTCTTTCGATTGC                   | MAL8P1.97R            | AATCTGCCCATTC AATTTGTTCC                 |
| MAL8P1.126  | MAL8P1.126F           | TCAGGGGGATACAGACTATTGC                   | MAL8P1.126R           | CTACCGTTTCGTTGTCCCTTAG                   |
| PF13_0289   | PF13_0289F            | CCAGGTGGATCATTAGTTACAGC                  | PF13_0289R            | TTTGCCTAGTTGGTTATTTTTG                   |
| PFL2290w    | PFL2290wF             | TAATGGATGGCAACAAACAAAC                   | PFL2290wR             | ATTCCAAAGAGTCGGATTGAAG                   |
| PFE0370c    | PFE0370cF             | AGGAGAAGGGAGCTTTGATTG                    | PFE0370cR             | GTTGAATGGCGTTTCCTTTTAG                   |
| PFE0045c    | PFE0045cF             | CGACATGTCCAAGAACTAAAGG                   | PFE0045cR             | ATGCCATATATGCCCATCATTCC                  |
| PF07_0014   | PF07_0014F            | CGCATCCTCAAAGAATACTC                     | PF07_0014R            | ATCTTTTGGTTCCTCCTCATGG                   |
| PF11_0092   | PF11_0092F            | TCTATGGATGGTTTGTACCAC                    | PF11_0092R            | CCTGGTCCGTTAGATTTTCATC                   |
| PF14_0516   | PF14_0516F            | TGGATTATACGAATGAAATGTGG                  | PF14_0516R            | ACTTTACCAAACGTCCCTTTCC                   |
| PFL2215w    | actinF                | GCAGCAGGAATCCACACAAC                     | actinR                | GTGGACAATACTTGGTCCTG                     |
